# Supplementary material for: Bimetallic Ag–Cu-trimesate metal–organic framework for hydrogen sulfide removal
Source: Royal Society of Chemistry journal article supplement (doi:10.1039/d1nj04601b), 2021-01-01
Supplement: d1nj04601b1.pdf [file d1nj04601b1.pdf]

## Bimetallic Ag-Cu-trimesate metal-organic framework for hydrogen sulfide removal

Nishesh Kumar Gupta<sup>a,b</sup>, Jiyeol Bae<sup>a,b</sup>, Kwang Soo Kim<sup>a,b\*</sup>

*a. University of Science and Technology (UST), Daejeon, Republic of Korea*

*b. Department of Land, Water, and Environment Research, Korea Institute of Civil Engineering and Building Technology (KICT), Goyang, Republic of Korea*

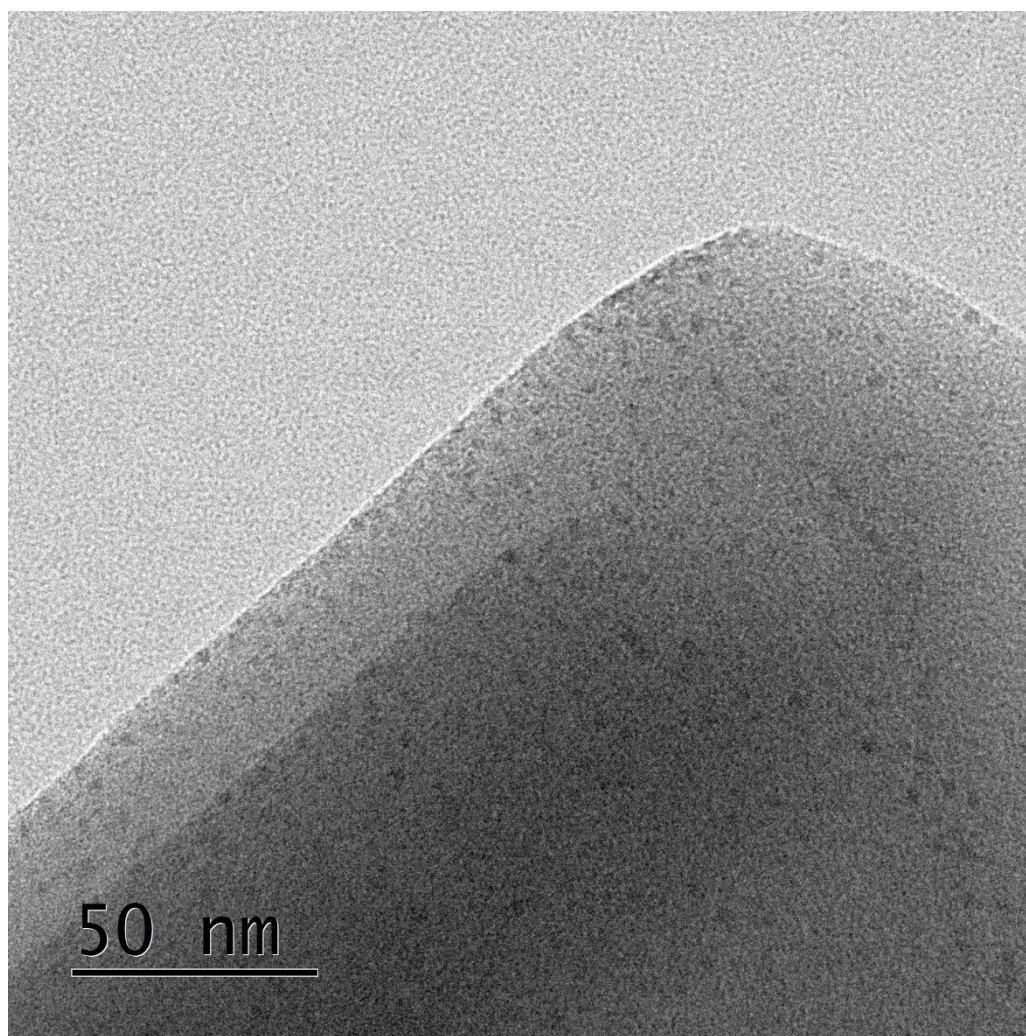

**Fig. S1.** HR-TEM image of Ag-Cu-MOF.

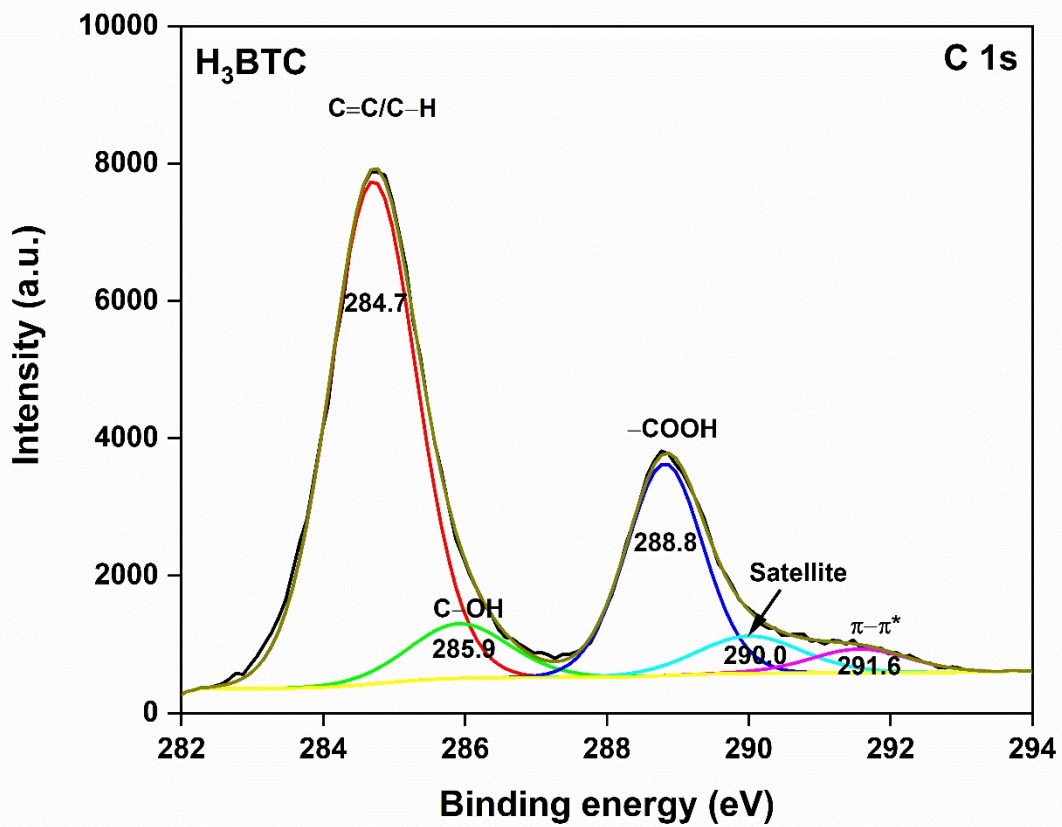

Fig. S2. HRXPS C 1s spectrum of H<sub>3</sub>BTC ligand.

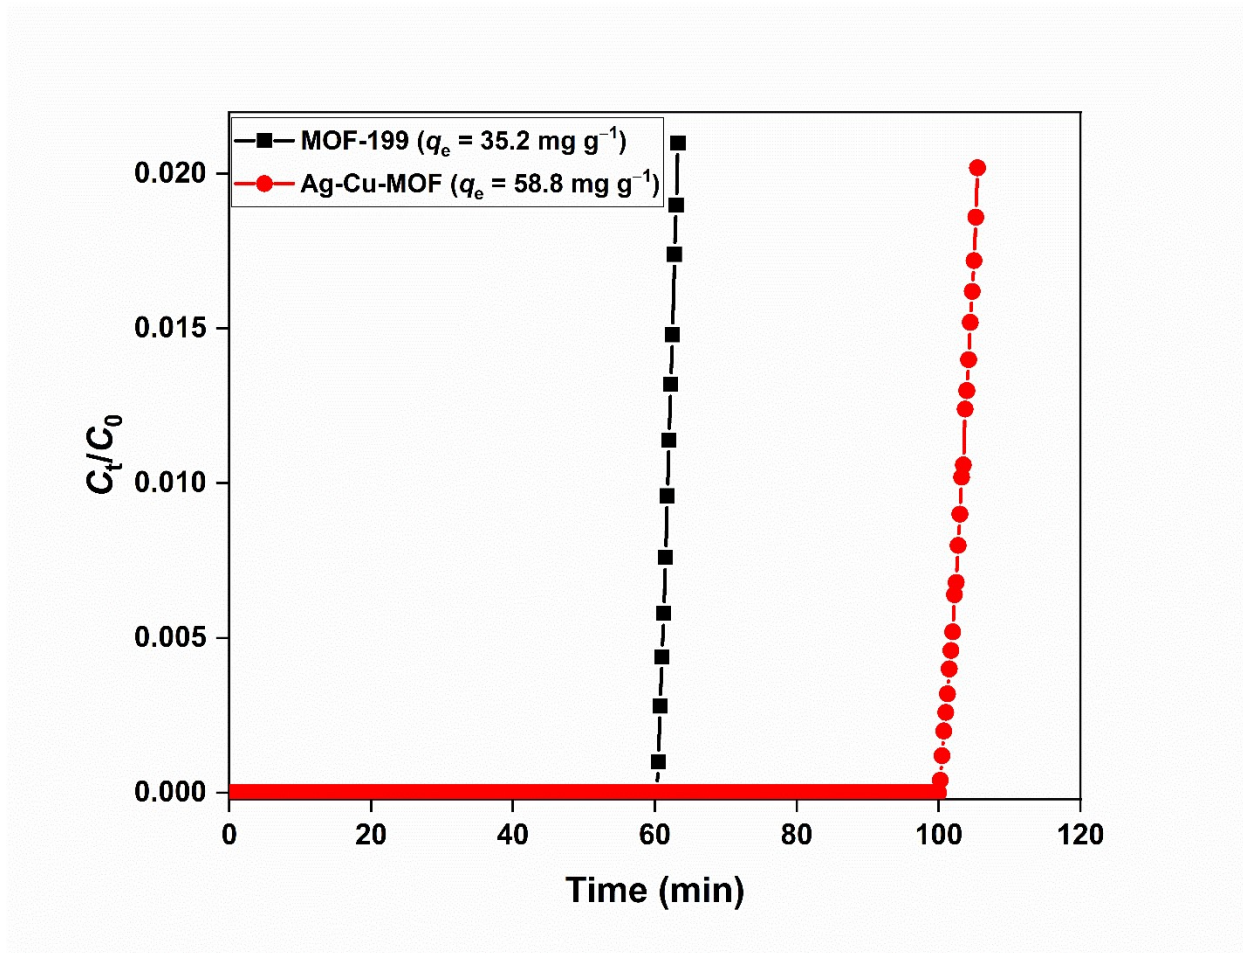

**Fig. S3.** H<sub>2</sub>S breakthrough curves of MOF-199 and Ag-Cu-MOF. Experimental conditions:

[MOF] = 0.25 g, flow rate = 0.2 L min<sup>-1</sup>, BTP = 2%.

The MOF-199 studied in this work was fabricated using the same method without silver nitrate salt.



**Table S1.** Curve fitting parameters for C 1s spectra of MOF and H<sub>3</sub>BTC ligand.

| <b>Samples</b>          | <b>Assignment</b>               | <b>E<sub>B</sub> (eV)</b> | <b>FWHM (eV)</b> | <b>At. %</b> |
|-------------------------|---------------------------------|---------------------------|------------------|--------------|
| <b>Ag-Cu-MOF</b>        | <b>C1s</b> <sub>C=C/C-H</sub>   | 284.7                     | 1.4              | 53.5         |
|                         | <b>C1s</b> <sub>C=O</sub>       | 286.1                     | 1.6              | 20.0         |
|                         | <b>C1s</b> <sub>O-C=O</sub>     | 288.5                     | 1.6              | 19.8         |
|                         | <b>C1s</b> <sub>satellite</sub> | 290.0                     | 1.9              | 6.7          |
| <b>H<sub>3</sub>BTC</b> | <b>C1s</b> <sub>C=C/C-H</sub>   | 284.7                     | 1.4              | 61.1         |
|                         | <b>C1s</b> <sub>C-OH</sub>      | 285.9                     | 1.6              | 7.6          |
|                         | <b>C1s</b> <sub>O-C=O</sub>     | 288.8                     | 1.3              | 22.7         |
|                         | <b>C1s</b> <sub>Satellite</sub> | 290.0                     | 1.7              | 5.4          |
|                         | <b>C1s</b> <sub>Satellite</sub> | 291.6                     | 1.6              | 3.2          |

**Table S2.** Curve fitting parameters for O 1s, N 1s, Cu 2p, and Ag 3d spectra of Ag-Cu-MOF.

| Curve | Assignment                            | $E_B$ (eV) | FWHM (eV) | At. % |
|-------|---------------------------------------|------------|-----------|-------|
| O 1s  | O-Ag/O-Cu                             | 531.2      | 1.4       | 19.8  |
|       | O-C=O                                 | 531.9      | 1.6       | 40.7  |
|       | Water                                 | 533.1      | 1.8       | 39.6  |
| N 1s  | $\text{NO}_3^-$                       | 407.1      | 1.7       | 100   |
| Cu 2p | Cu 2p <sub>3/2</sub> Cu <sup>+</sup>  | 932.2      | 1.7       | 10.1  |
|       | Cu 2p <sub>3/2</sub> Cu <sup>2+</sup> | 934.6      | 2.3       | 89.9  |
|       | Satellite Cu <sup>2+</sup>            | 939.7      | 4.0       | -     |
|       | Satellite Cu <sup>2+</sup>            | 943.8      | 3.5       | -     |
| Ag 3d | Ag 3d <sub>5/2</sub> Ag <sup>+</sup>  | 368.0      | 1.3       | 72.8  |
|       | Ag 3d <sub>5/2</sub> Ag <sup>0</sup>  | 369.3      | 1.6       | 27.2  |

**Table S3.** Curve fitting parameters for Cu 2p, S 2p, and Ag 3d spectra of spent and regenerated MOF.

| Curve            | Assignment                            | $E_B$ (eV) | FWHM (eV) | At. % |
|------------------|---------------------------------------|------------|-----------|-------|
| Spent MOF/ Cu 2p | Cu 2p <sub>3/2</sub> Cu <sup>+</sup>  | 932.1      | 1.7       | 17.3  |
|                  | Cu 2p <sub>3/2</sub> Cu <sup>2+</sup> | 934.5      | 2.2       | 77    |
|                  | Satellite Cu <sup>2+</sup>            | 938.8      | 4.0       | -     |
|                  | Satellite Cu <sup>2+</sup>            | 943.5      | 3.5       | -     |
| Reg. MOF/ Cu 2p  | Cu 2p <sub>3/2</sub> Cu <sup>+</sup>  | 932.4      | 1.4       | 13.9  |
|                  | Cu 2p <sub>3/2</sub> Cu <sup>2+</sup> | 934.7      | 2.3       | 86.1  |

|                                 |                                   |       |     |      |
|---------------------------------|-----------------------------------|-------|-----|------|
|                                 | <b>Satellite</b> $\text{Cu}^{2+}$ | 939.2 | 4.0 | -    |
|                                 | <b>Satellite</b> $\text{Cu}^{2+}$ | 943.8 | 3.5 | -    |
| <b>Spent MOF/ Ag 3d</b>         | <b>Ag 3d</b> $_{5/2} \text{Ag}^+$ | 368.2 | 1.6 | 22.3 |
|                                 | <b>Ag 3d</b> $_{5/2} \text{Ag}^0$ | 370.1 | 2.1 | 77.7 |
| <b>Reg. MOF/ Ag 3d</b>          | <b>Ag 3d</b> $_{5/2} \text{Ag}^+$ | 368.4 | 1.4 | 69.1 |
|                                 | <b>Ag 3d</b> $_{5/2} \text{Ag}^0$ | 369.4 | 1.8 | 30.9 |
| <b>Spent MOF/ S 2p</b> $_{3/2}$ | <b>S</b> $^{2-}$                  | 162.1 | 1.6 | 17.4 |
|                                 | <b>SO</b> $_4^{2-}$               | 169.0 | 1.7 | 58.2 |
|                                 | <b>HSO</b> $_4^-$                 | 170.8 | 1.9 | 24.4 |
| <b>Reg. MOF/ S 2p</b> $_{3/2}$  | <b>S</b> $^{2-}$                  | 162.9 | 1.6 | 20.2 |
|                                 | <b>SO</b> $_4^{2-}$               | 168.9 | 1.7 | 59.4 |
|                                 | <b>HSO</b> $_4^-$                 | 171.0 | 1.9 | 20.4 |
